# Supplementary material
Source: Springer Nature journal article supplement (https://www.springermedizin.de/resource/supplementary/12891_2014_2318_MOESM4_ESM.pdf/9509766)
Supplement: MOESM4 [file 9509766]

**INSTRUCTIONS:** This survey asks for your view about your knee. This information will help us keep track of how you feel about your knee and how well you are able to do your usual activities.

**Answer every question by checking the appropriate box. If you are unsure about how to answer a question, please give the best answer you can.**

The following questions concern your physical function. By this we mean your ability to move around and to look after yourself. For each of the following activities, please indicate the degree of difficulty you have experienced in the **last 48 hours** due to your knee.

1. Taking off socks/stockings

| None                       | Mild                       | Moderate                   | Severe                     | Extreme                    |
|----------------------------|----------------------------|----------------------------|----------------------------|----------------------------|
| ▼                          | ▼                          | ▼                          | ▼                          | ▼                          |
| <input type="checkbox"/> 1 | <input type="checkbox"/> 2 | <input type="checkbox"/> 3 | <input type="checkbox"/> 4 | <input type="checkbox"/> 5 |

2. Getting on the toilet

| None                       | Mild                       | Moderate                   | Severe                     | Extreme                    |
|----------------------------|----------------------------|----------------------------|----------------------------|----------------------------|
| ▼                          | ▼                          | ▼                          | ▼                          | ▼                          |
| <input type="checkbox"/> 1 | <input type="checkbox"/> 2 | <input type="checkbox"/> 3 | <input type="checkbox"/> 4 | <input type="checkbox"/> 5 |

3. Light domestic duties

| None                       | Mild                       | Moderate                   | Severe                     | Extreme                    |
|----------------------------|----------------------------|----------------------------|----------------------------|----------------------------|
| ▼                          | ▼                          | ▼                          | ▼                          | ▼                          |
| <input type="checkbox"/> 1 | <input type="checkbox"/> 2 | <input type="checkbox"/> 3 | <input type="checkbox"/> 4 | <input type="checkbox"/> 5 |

4. Rising from bed

| None                       | Mild                       | Moderate                   | Severe                     | Extreme                    |
|----------------------------|----------------------------|----------------------------|----------------------------|----------------------------|
| ▼                          | ▼                          | ▼                          | ▼                          | ▼                          |
| <input type="checkbox"/> 1 | <input type="checkbox"/> 2 | <input type="checkbox"/> 3 | <input type="checkbox"/> 4 | <input type="checkbox"/> 5 |

The following question concerns the amount of joint stiffness you have experienced during the **last 48 hours** in your knee. Stiffness is a sensation of restriction or slowness in the ease with which you move your knee joint.

5. How severe is your knee joint stiffness after first awakening in the morning?

| None                       | Mild                       | Moderate                   | Severe                     | Extreme                    |
|----------------------------|----------------------------|----------------------------|----------------------------|----------------------------|
| ▼                          | ▼                          | ▼                          | ▼                          | ▼                          |
| <input type="checkbox"/> 1 | <input type="checkbox"/> 2 | <input type="checkbox"/> 3 | <input type="checkbox"/> 4 | <input type="checkbox"/> 5 |

**INTERPRETATION:**

The patient is **AT RISK** in case of any of the following combination of answers:

Q1: Moderate (3) or Severe (4) or Extreme (5)

Q2: Moderate (3) or Severe (4) or Extreme (5)

Q4: Severe (4) Extreme (5)

**OR**

Q1: Moderate (3) or Severe (4) or Extreme (5)

Q2: None (1) or Mild (2)

**OR**

Q1: None (1) or Mild (2)

Q3: Moderate (3) or Severe (4) or Extreme (5)

Q5: Severe (4) or Extreme (5)
